# Supplementary material for: Redox-driven synthesis of stable copper nanoparticles via metal displacement and their application in organic dye degradation
Source: Royal Society of Chemistry journal article supplement (doi:10.1039/d5ma00769k), 2025-01-01
Supplement: d5ma00769k1.pdf [file d5ma00769k1.pdf]

## **Redox-Driven Synthesis of Stable Copper Nanoparticles via Metal Displacement and Their Application in Organic Dye Degradation**

Rajinikumar Kandikonda<sup>a</sup>, Govindhasamy Murugadoss<sup>b</sup>, Nachimuthu Venkatesh<sup>b</sup>, Siva Shankari Velmurugan Subbaraj<sup>c</sup>, Divya Palani<sup>c</sup>, Suneetha Thota<sup>d</sup>, Rakesh Kumar Rajaboina<sup>a</sup>, Haranath Divi<sup>a</sup>, Manikandan Dhayalan<sup>e\*</sup>, Anuchit Phanumartwiwath<sup>e\*</sup>, Chenna Reddy Mallu<sup>d\*</sup>, Uday Kumar Khanapuram<sup>a\*</sup>

<sup>a</sup>Energy Materials and Devices (EMD) Laboratory, Department of Physics, National Institute of Technology, Warangal 506004, Telangana, INDIA.

<sup>b</sup>Centre for Nanoscience and Nanotechnology, Sathyabama Institute of Science and Technology, Chennai-600 119, Tamil Nadu, INDIA.

<sup>c</sup>Centre for Waste Management, Sathyabama Institute of Science and Technology, Chennai-600 119, Tamil Nadu, INDIA.

<sup>d</sup>Department of Chemistry, Freshman Engineering, Geethanjali College of Engineering and Technology, Hyderabad, Telangana, INDIA.

<sup>e</sup>College of Public Health Sciences (CPHS), Chulalongkorn University. Bangkok, 10330, THAILAND.

Corresponding Authors: manikandandhayalan88@gmail.com,  
malluchennareddypvc@gmail.com, kanapuram.udaykumar@nitw.ac.in

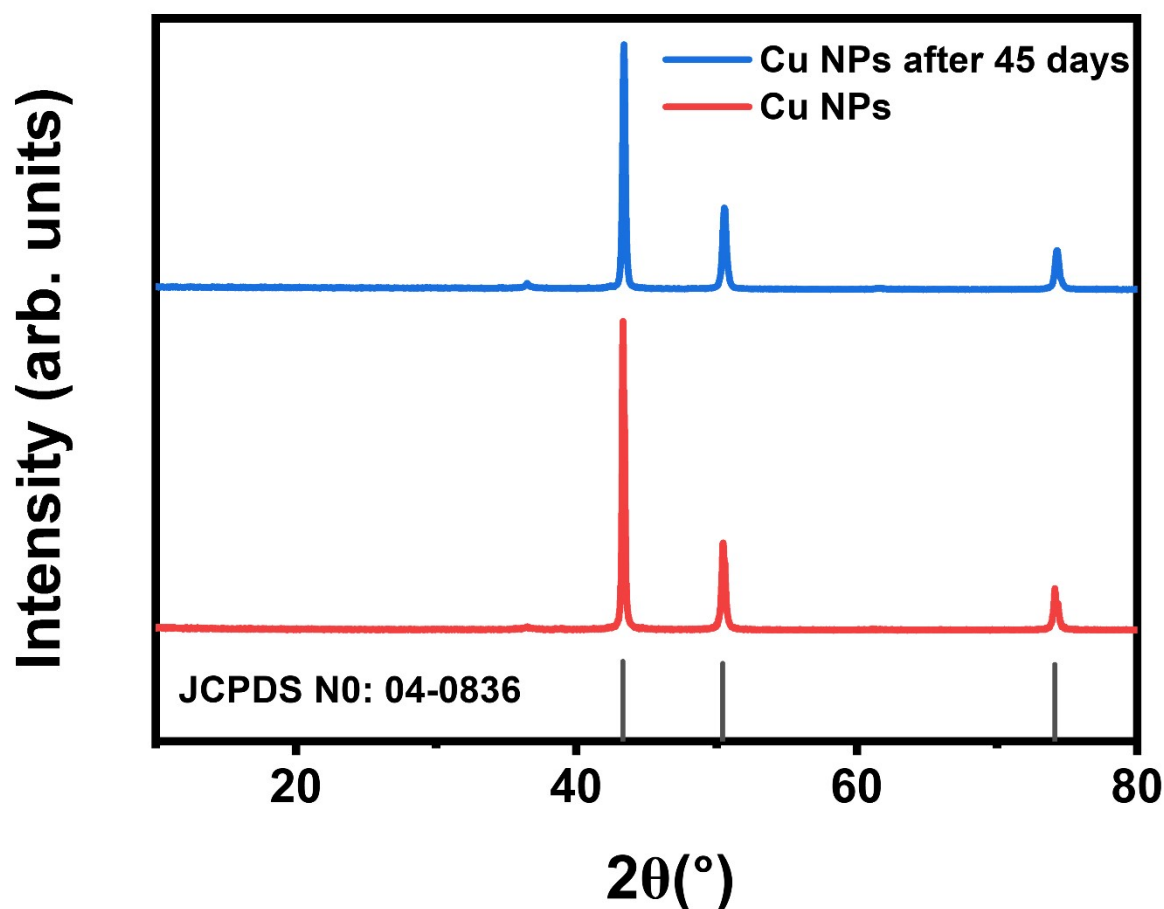

**Figure S1:** XRD patterns of Cu NPs immediately after synthesis and after 45 days.

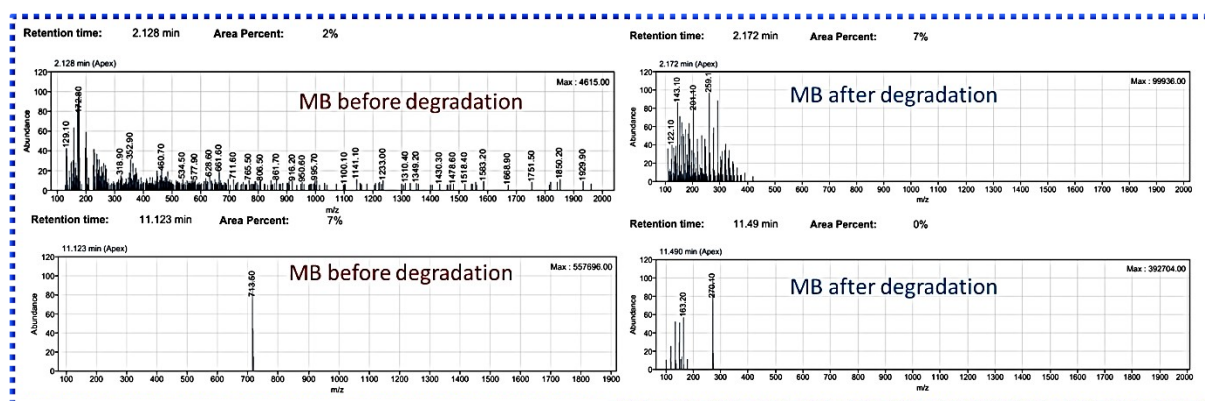

**Figure S2:** LC-MS analysis of methylene blue (MB) dye before and after photocatalytic degradation. Mass spectra before and after degradation reveal the loss of parent ion peaks and emergence of low-mass fragments, confirming the formation of intermediate products.

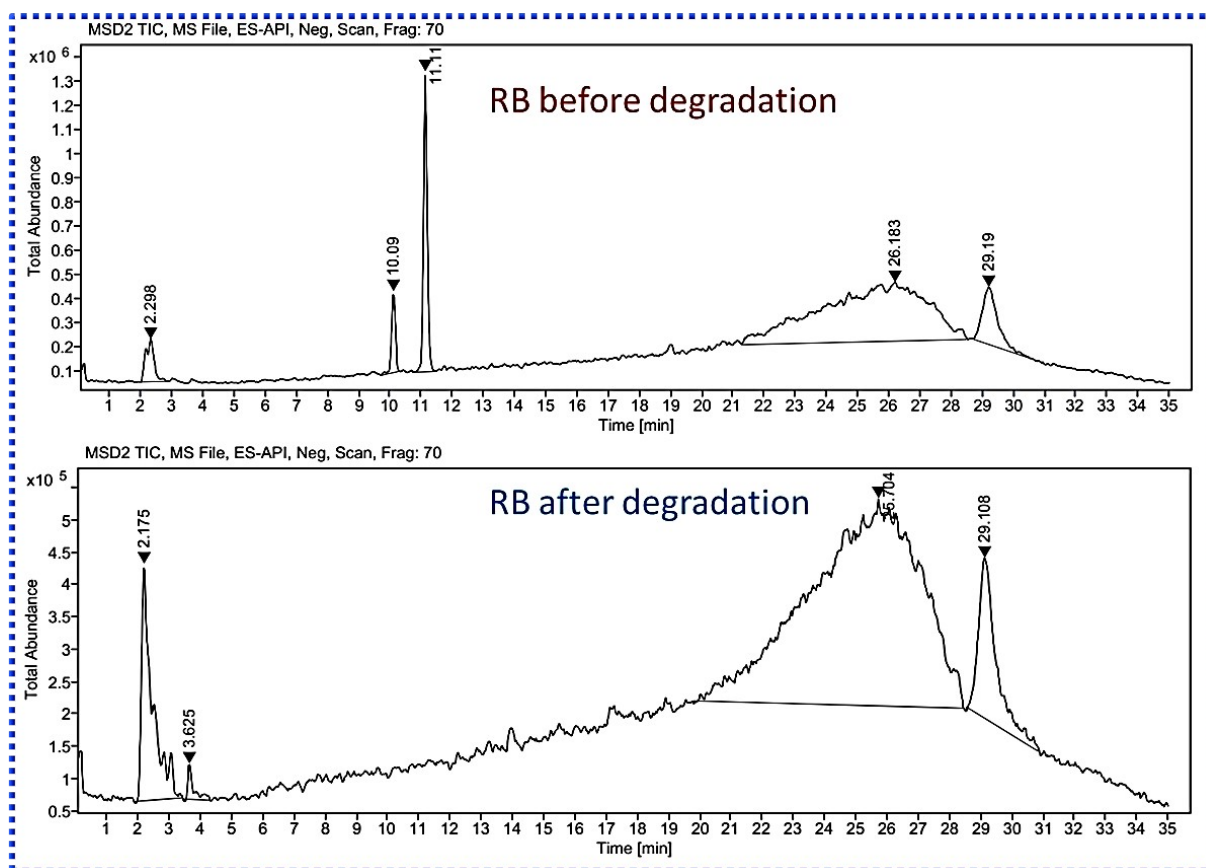

**Figure S3:** LC-MS analysis of Rose Bengal (RB) dye before and after photocatalytic degradation. (a) Total ion chromatograms (TIC) showing the disappearance of major RB peaks and appearance of new peaks post-treatment, indicating degradation.

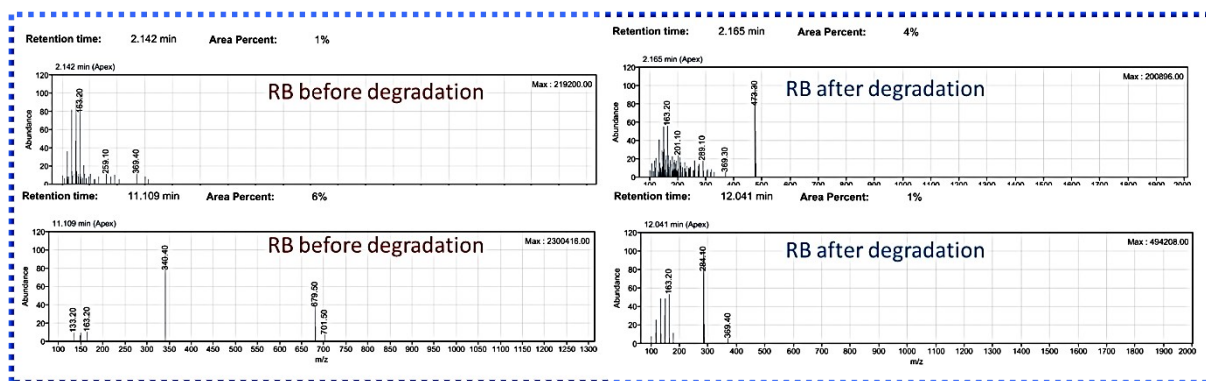

**Figure S4:** LC-MS analysis of Rose Bengal (RB) dye before and after photocatalytic degradation. Mass spectra before and after degradation reveal the loss of parent ion peaks and emergence of low-mass fragments, confirming the formation of intermediate products.
